# Supplementary material for: A continued role of short-lived climate forcers under the Shared Socioeconomic Pathways
Source: Copernicus journal article supplement (doi:10.5194/esd-11-977-2020), 2020-11-09
Supplement: Supplementary file 1 [file esd-11-977-2020-supplement.pdf]

Supplement of Earth Syst. Dynam., 11, 977–993, 2020  
<https://doi.org/10.5194/esd-11-977-2020-supplement>  
© Author(s) 2020. This work is distributed under  
the Creative Commons Attribution 4.0 License.

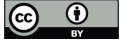

*Supplement of*

## **A continued role of short-lived climate forcers under the Shared Socioeconomic Pathways**

**Marianne T. Lund et al.**

*Correspondence to:* Marianne T. Lund ([m.t.lund@cicero.oslo.no](mailto:m.t.lund@cicero.oslo.no))

The copyright of individual parts of the supplement might differ from the CC BY 4.0 License.

## Section S1 Sensitivity of our results to choice of IRF

The AGTP depends on the choice of impulse response function for CO<sub>2</sub> (IRF<sub>CO2</sub>) and climate response (IRF<sub>T</sub>). To explore this sensitivity in more detail, we repeat our calculations using alternative climate and CO<sub>2</sub> IRF combinations. Figure S1 show the resulting AGTPs as a function of time for CO<sub>2</sub>, CH<sub>4</sub> and SO<sub>2</sub>. The largest difference is seen between results using the B&R08 IRF<sub>T</sub> (Boucher & Reddy, 2008) and the G13 (Geoffroy et al., 2013) (default in our study) or G17 (Gasser et al., 2017) IRF<sub>T</sub>. Unless otherwise stated, the IRF<sub>CO2</sub> from Joos et al. (2013) is used. The longer time scales of the climate system response in B&R08 compared to both G13 and G17, results in an AGTP that is lower up to approx. 15 years and higher thereafter for CH<sub>4</sub> and CO<sub>2</sub>, and stronger (i.e., more negative) for SO<sub>2</sub> already after 5 years. Although we do not present normalized metrics here, we note that they would differ from values reported by the Fifth Assessment Report by the IPCC (AR5), who used the B&R08 IRF<sub>T</sub> (Myhre et al., 2013). As an illustration, Table S1 shows the GTP for methane for time horizons 10, 20 and 100 years (a detailed comparison for the other SLCFs is difficult due to different underlying radiative efficiencies). We also show values taken from the IPCC AR5. The difference between AR5 and values calculated using the B&R08 IRF<sub>T</sub> in the present study arises from the 14% increase in the radiative efficiency of methane that we apply based on (Etminan et al., 2016). Using G13 or G17 IRF<sub>T</sub> results in 4-18% lower GTPs compared to those based on B&R08 for two short time horizons, and increased metric values on the 100-year horizon. Using the CO<sub>2</sub> IRF from G17 without the carbon-climate feedback included increases the methane GTP by 2, 5 and 11% for 10, 20 and 100 years, respectively, compared to using the G17 IRF<sub>CO2</sub> with carbon climate feedback. As noted by G17 this difference can be larger for shorter-lived species like BC and SO<sub>2</sub>.

We also investigate what the choice of IRFs mean for our global and regional near- and long-term temperature responses. Figure S2 shows the global-mean surface temperature response following global present-day emissions using results with the B&R08, G13 and G17 IRF<sub>T</sub>. The two latter yields similar results, while the total effect after 10 years is lower with B&R08 due to a combination of smaller contributions from CH<sub>4</sub> and CO<sub>2</sub> and stronger cooling contributions. We also note that while the overall picture of regional and sectoral SLCF and CO<sub>2</sub> contributions largely remains the same, the differences between B&R08 and G13 are sufficiently large to affect the ranking by total net near-term temperature impact of some regions and sectors compared to our main Fig.2. For instance, stronger cooling contributions with the B&R08 IRF<sub>T</sub> reduces the net warming of the ENE sectors, moving AGR up as the sectors with the largest net temperature impact. Similarly, SAS and MDE, regions with significant cooling emissions and relatively small CO<sub>2</sub> emissions, are moved down. The net temperature response to emissions in SAS switches from to a small net negative on the 10-year timescale.

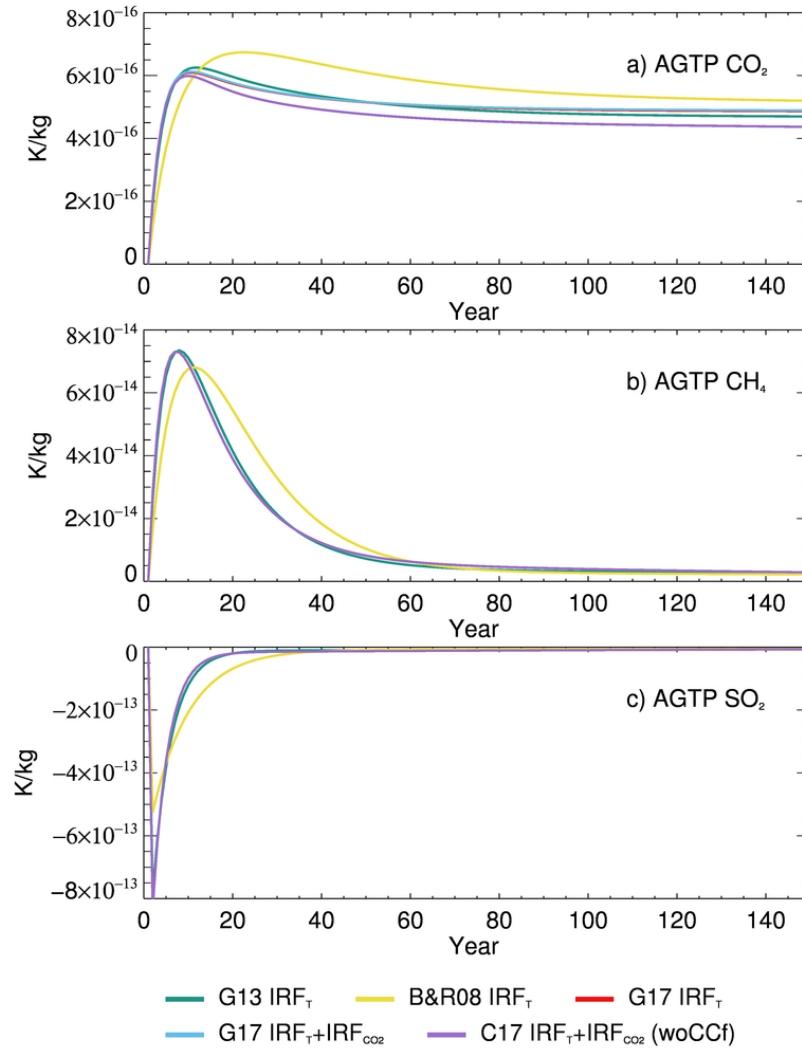

Figure S1: AGTP(t) for CO<sub>2</sub>, CH<sub>4</sub> and SO<sub>2</sub> as calculated using different combinations of climate response and carbon dioxide impulse response functions: B&R08 (Boucher & Reddy, 2008), G13 (Geoffroy et al., 2013) and G17 (Gasser et al., 2017) (all with the Joos et al. (2013) CO<sub>2</sub> IRF), and G17 with corresponding CO<sub>2</sub> IRFs with and without the carbon-climate feedback included.

Table S1: GTPs for methane using different combinations of climate response and CO<sub>2</sub> IRFs.

| Time horizon                                     | GTP of methane |    |     |
|--------------------------------------------------|----------------|----|-----|
|                                                  | 10             | 20 | 100 |
| AR5                                              | 100            | 64 | 4   |
| B&R08 IRF <sub>T</sub>                           | 114            | 77 | 5   |
| G13 IRF <sub>T</sub>                             | 109            | 65 | 6   |
| G17 IRF <sub>T</sub>                             | 108            | 63 | 8   |
| G17 IRF <sub>T</sub> +IRF <sub>CO2</sub>         | 108            | 63 | 8   |
| G17 IRF <sub>T</sub> +IRF <sub>CO2</sub> (noCCf) | 110            | 67 | 9   |

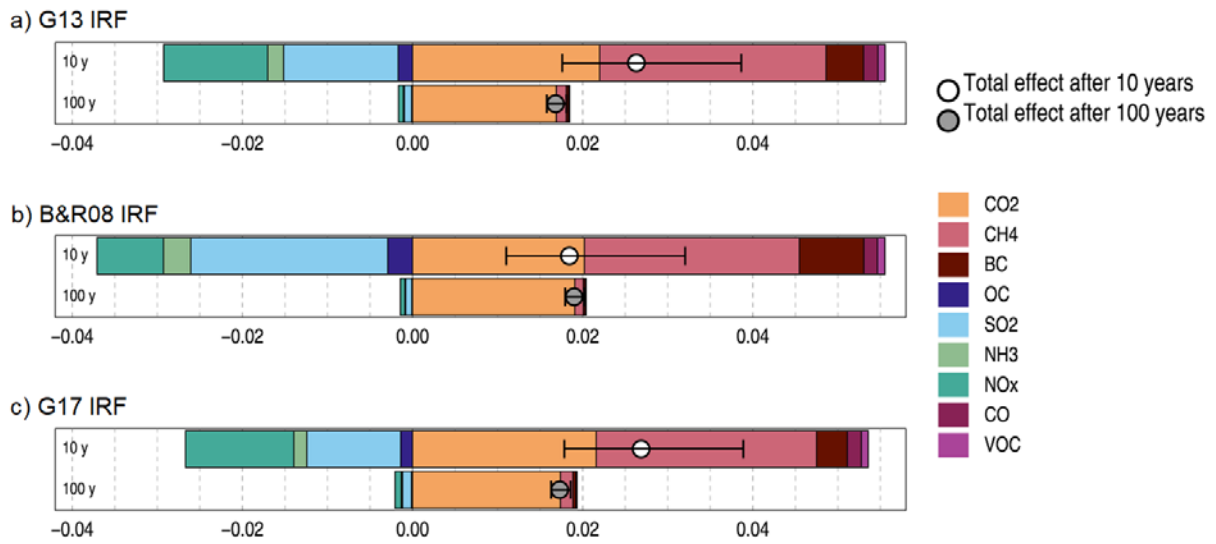

*Figure S2: Global-mean surface temperature impact 10 and 100 years after one year of global present-day (i.e., year 2014) emissions of SLCFs and CO<sub>2</sub>, calculated using different combinations of climate response.*

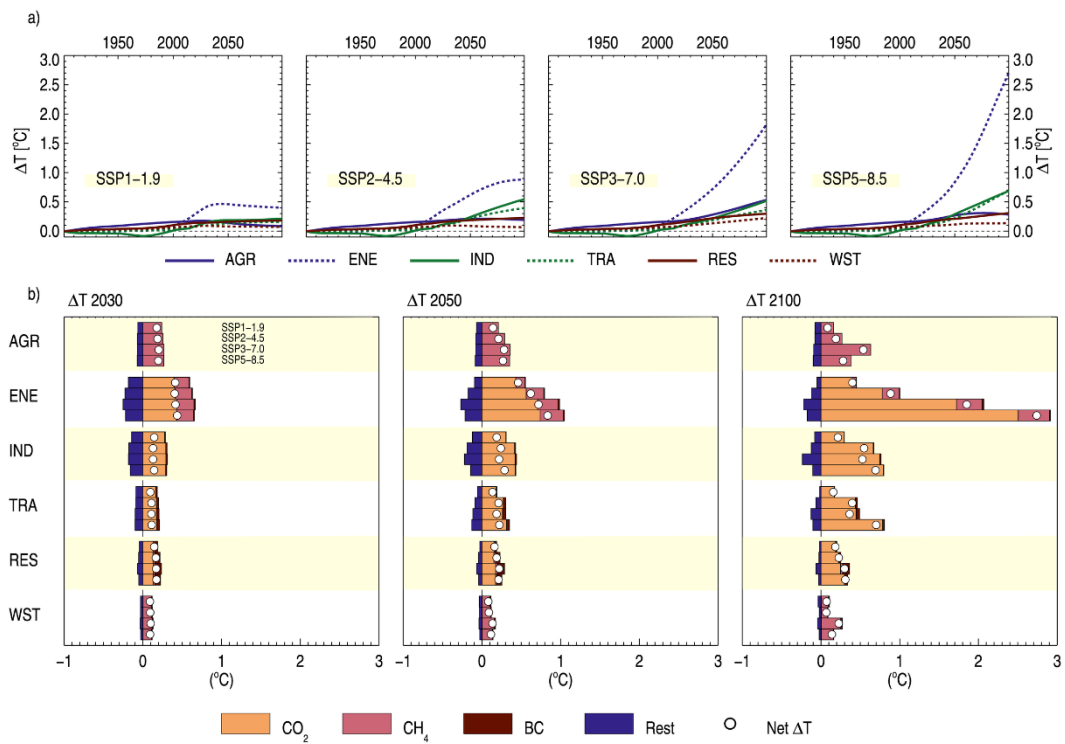

Figure S3: Global mean temperature response to historical emissions and future SSP pathways: a) Net (i.e., sum over all species and regions) response over the period 1900 to 2100 for each sector and scenario and b) net response in 2030, 2050 and 2100 to emissions in six of our seven sectors (excluding shipping, which remains much smaller than the rest), broken down by contributions from  $\text{CO}_2$ , BC, methane and the sum of  $\text{SO}_2$ , OC,  $\text{NH}_3$  and ozone precursors (“Rest”).

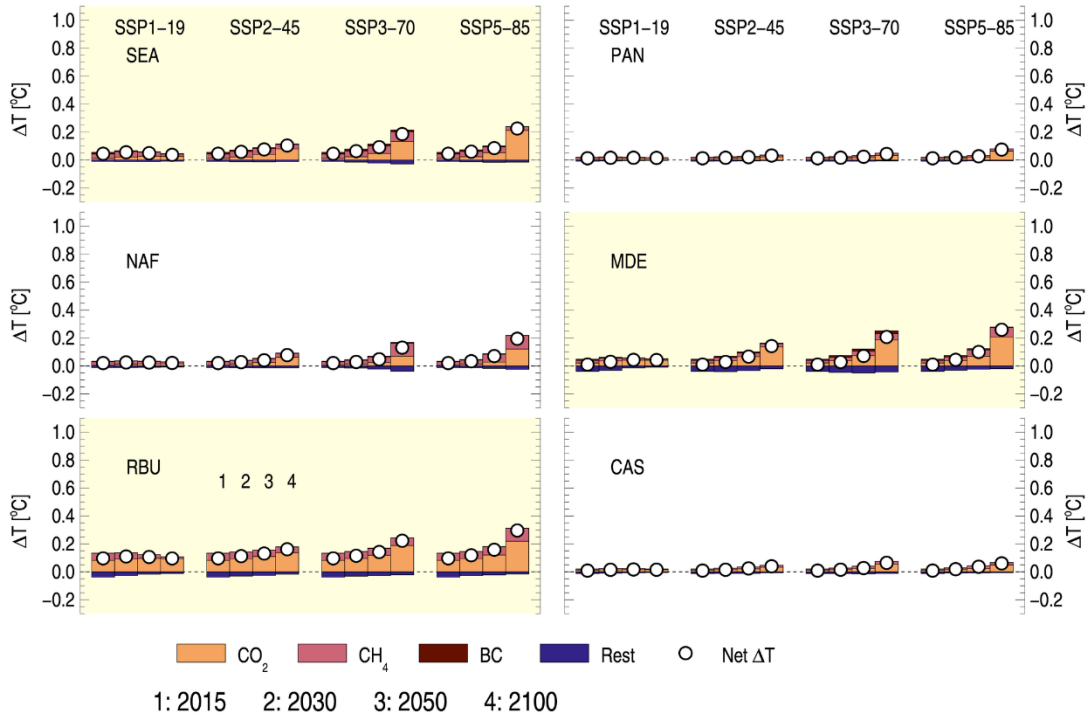

Figure S4: Global mean temperature response to historical emissions and future SSP pathways: Net response in 2015, 2030, 2050 and 2100 to emissions in six regions broken down by contributions from CO<sub>2</sub>, BC, methane and the sum of SO<sub>2</sub>, OC, NH<sub>3</sub> and ozone precursors (i.e., “Rest”).

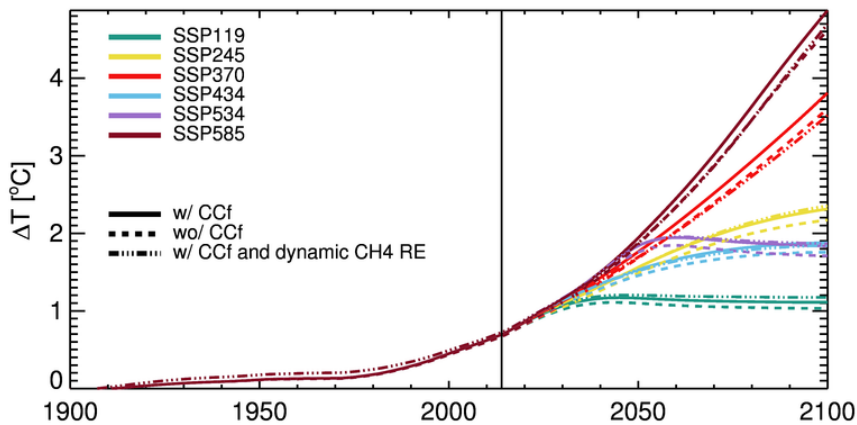

Figure S5: Impact of including carbon-climate feedback and dynamical methane radiative efficiency in the AGTP calculation on global mean total net temperature response to total emissions (i.e. sum of our sectors and regions) under 6 of the SSP-RCPs.

## References:

- Boucher O. & Reddy M. S. Climate trade-off between black carbon and carbon dioxide emissions, *Energy Policy*. 36(1), 193-200, <https://doi.org/10.1016/j.enpol.2007.08.039>, 2008.
- Etminan M., Myhre G., Highwood E. J., et al. Radiative forcing of carbon dioxide, methane, and nitrous oxide: A significant revision of the methane radiative forcing, *Geophysical Research Letters*. 43(24), 12,614-612,623, 10.1002/2016gl071930, 2016.
- Gasser T., Peters G. P., Fuglestedt J. S., et al. Accounting for the climate-carbon feedback in emission metrics, *Earth Syst. Dynam.* 8(2), 235-253, 10.5194/esd-8-235-2017, 2017.
- Geoffroy O., Saint-Martin D., Olivié D. J. L., et al. Transient Climate Response in a Two-Layer Energy-Balance Model. Part I: Analytical Solution and Parameter Calibration Using CMIP5 AOGCM Experiments, *Journal of Climate*. 26(6), 1841-1857, 10.1175/jcli-d-12-00195.1, 2013.
- Joos F., Roth R., Fuglestedt J. S., et al. Carbon dioxide and climate impulse response functions for the computation of greenhouse gas metrics: a multi-model analysis, *Atmos. Chem. Phys.* 13(5), 2793-2825, 10.5194/acp-13-2793-2013, 2013.
- Myhre G., Shindell D., Brèon F.-M., et al. Anthropogenic and natural radiative forcing. In: *Climate Change 2013: The Physical Science Basis. Contribution of Working Group I to the Fifth Assessment Report of the Intergovernmental Panel on Climate Change* [Stocker, T.F., D., Qin, G.-K. Plattner, M. Tignor, S.K. Allen, J. Boschung, A. Nauels, Y. Xia, V. Bex and P.M. Midgley (eds)]. Cambridge University Press, Cambridge, United Kingdom and New York, NY, USA 2013.
